# Supplementary material
Source: Springer Nature journal article supplement (https://www.springermedizin.de/resource/supplementary/12916_2012_695_MOESM3_ESM.pdf/9598554)
Supplement: MOESM3 [file 9598554]

**No. of  
Studies**

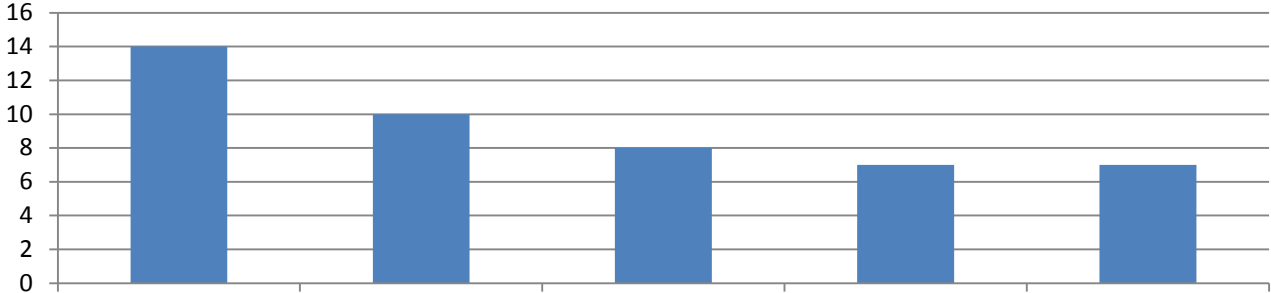

Huntington's Disease   Hereditary Breast and Ovarian Cancer   Hemochromatosis   Hypercholesterolemia   Colorectal Cancer

**Genetic  
conditions**
